# Supplementary material for: Evaluating Bidirectional Predictive Pathways between Dietary Restraint and Food Addiction in Adolescents
Source: MDPI journal article supplement (doi:10.3390/nu15132977), 2023-06-30
Supplement: s1 [file s1]

## Supplemental Materials

Supplemental Figure S1. Path Diagram for Adjusted Cross-lagged Panel Analysis among Food Addiction, Dietary Restraint, and Covariates (Age, Gender, and BMI z-score)

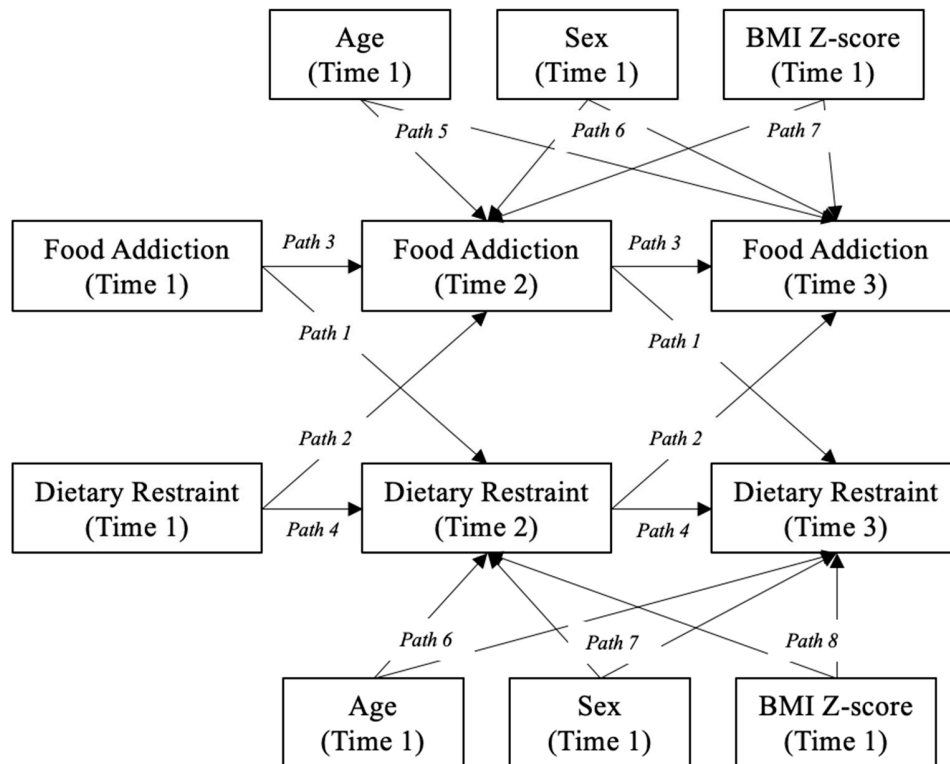

*Note.* Path 1: food addiction as a predictor for future dietary restraint; Path 2: dietary restraint as a predictor for future food addiction; Path 3: auto-regressive path for food addiction over time; Path 4: auto-regressive path for dietary restraint over time; Paths 5, 6, and 7: confounding effects of covariates (age, gender, and BMI z-Score).

Supplemental Table S1. Summary of Bivariate Correlations Among Adolescent Food Addiction, Dietary Restraint, and Associated Covariates

|                              | Sex     | Age    | BMI Z-score |
|------------------------------|---------|--------|-------------|
| Food Addiction (dYFAS-C 2.0) |         |        |             |
| Time 1                       | 0.29*** | 0.27** | 0.33***     |
| Time 2                       | 0.30**  | 0.33** | 0.25**      |
| Time 3                       | 0.29**  | 0.29** | 0.24*       |
| Dietary Restraint (DEBQ-R)   |         |        |             |
| Time 1                       | 0.24**  | 0.20*  | 0.43***     |
| Time 2                       | 0.21*   | 0.28** | 0.27***     |
| Time 3                       | 0.11    | 0.30** | 0.36***     |

*Note.* dYFAS-C 2.0 = Dimensional Yale Food Addiction Scale for Children 2.0. DEBQ-R = Dutch Eating Behavior Questionnaire Restraint Subscale. Asterisks denote significance: \*  $p < .05$ , \*\*  $p < .01$ , and \*\*\*  $p < .001$ . Gender (coded 1=male, 2=female).

Supplemental Table S2. Standardized Regression Coefficients from Adjusted Structural Equation Models with Covariates

| Path | Predictor         | Outcome           | <i>b</i> | SE   | <i>Z</i> | <i>p</i> | 95% CI<br>lower | 95% CI<br>upper |
|------|-------------------|-------------------|----------|------|----------|----------|-----------------|-----------------|
| 1    | Food addiction    | Dietary restraint | 0.23     | 0.06 | 3.80     | < .001   | 0.11            | 0.35            |
| 2    | Dietary restraint | Food addiction    | 0.05     | 0.05 | 0.90     | 0.37     | -0.06           | 0.15            |
| 3    | Food addiction    | Food addiction    | 0.70     | 0.05 | 13.59    | < .001   | 0.60            | 0.80            |
| 4    | Dietary restraint | Dietary restraint | 0.54     | 0.06 | 9.12     | < .001   | 0.42            | 0.66            |
| 5    | Age               | Dietary restraint | 0.02     | 0.05 | 0.30     | .76      | -0.09           | 0.12            |
| 6    | Gender            | Dietary restraint | 0.05     | 0.11 | 0.42     | .67      | -0.17           | 0.23            |
| 7    | BMI               | Dietary restraint | 0.10     | 0.06 | 1.56     | .12      | -0.03           | 0.17            |
| 8    | Age               | Food addiction    | 0.07     | 0.05 | 1.51     | .13      | -0.02           | 0.17            |
| 9    | Gender            | Food addiction    | 0.18     | 0.09 | 1.90     | .06      | -0.01           | 0.36            |
| 10   | BMI               | Food addiction    | -0.02    | 0.06 | -0.31    | .76      | -0.13           | 0.09            |

Model Fit:  $X^2(20) = 70.5$  ( $p < .01$ ); SRMR = 0.14; CFI = 0.86. CI = confidence interval
